# Supplementary material
Source: PubMed Central journal article supplement (PMC4212322)
Supplement: DS_10.1177_0022034514546165.pdf [file DS_10.1177_0022034514546165.pdf]

G.D. Slade<sup>1\*</sup>, A.A. Akinkugbe<sup>1</sup>,  
and A.E. Sanders<sup>1</sup>

<sup>1</sup>Department of Dental Ecology, University of North Carolina at Chapel Hill,  
USA; \*corresponding author, gary\_slade@dentistry.unc.edu

*J Dent Res* DOI: 10.1177/0022034514546165

# Projections of U.S. Edentulism Prevalence Following 5 Decades of Decline

## APPENDIX

**Appendix Table 1.** Edentulism Prevalence Estimates from Figure 1 Used for Age Cohort Regression Models and Projections

| Year of Birth | Survey Period | Age, yr <sup>a</sup> | Prevalence (%) | SE     |
|---------------|---------------|----------------------|----------------|--------|
| 1914-1923     | 1957-1958     | 39                   | 9.5820         | 0.4715 |
| 1914-1923     | 1971-1975     | 54                   | 22.8403        | 1.3549 |
| 1914-1923     | 1988-1994     | 72                   | 30.7550        | 1.9748 |
| 1914-1923     | 1999-2002     | 82                   | 30.6358        | 2.1891 |
| 1924-1933     | 1957-1958     | 29                   | 3.5711         | 0.2790 |
| 1924-1933     | 1971-1975     | 44                   | 10.4663        | 0.9961 |
| 1924-1933     | 1988-1994     | 62                   | 24.4188        | 1.3586 |
| 1924-1933     | 1999-2002     | 72                   | 24.9535        | 1.6840 |
| 1924-1933     | 2009-2012     | 82                   | 24.2848        | 1.9109 |
| 1934-1943     | 1957-1958     | 19                   | 0.9197         | 0.1361 |
| 1934-1943     | 1971-1975     | 34                   | 5.5702         | 0.6068 |
| 1934-1943     | 1988-1994     | 52                   | 13.0181        | 1.4520 |
| 1934-1943     | 1999-2002     | 62                   | 15.6560        | 1.4577 |
| 1934-1943     | 2009-2012     | 72                   | 17.7002        | 1.7875 |
| 1944-1953     | 1971-1975     | 24                   | 0.7875         | 0.1532 |
| 1944-1953     | 1988-1994     | 42                   | 3.9092         | 0.5523 |
| 1944-1953     | 1999-2002     | 52                   | 6.2658         | 0.8713 |
| 1944-1953     | 2009-2012     | 62                   | 7.8798         | 1.0503 |
| 1954-1963     | 1988-1994     | 32                   | 1.0669         | 0.2038 |
| 1954-1963     | 1999-2002     | 42                   | 2.0542         | 0.4758 |
| 1954-1963     | 2009-2012     | 52                   | 3.8914         | 0.8476 |
| 1964-1973     | 1988-1994     | 22                   | 0.0828         | 0.0635 |
| 1964-1973     | 1999-2002     | 32                   | 0.7118         | 0.2878 |
| 1964-1973     | 2009-2012     | 42                   | 1.6656         | 0.3465 |

<sup>a</sup>At time of survey (midpoint).

**Appendix Table 2.** Prevalence of Edentulism among Adults Aged  $\geq 25$  Yr in 4 U.S. Geographic Regions, 1957-1958 and 2010

| Region        | Prevalence of Edentulism, % (95% Confidence Limits) |                   |
|---------------|-----------------------------------------------------|-------------------|
|               | 1957-1958 <sup>a</sup>                              | 2010 <sup>b</sup> |
| South         | 23.0 (21.7, 24.4)                                   | 6.7 (6.5, 6.9)    |
| North Central | 25.3 (23.9, 26.7)                                   | 5.6 (5.4, 5.8)    |
| Northeast     | 20.3 (19.0, 21.6)                                   | 5.0 (4.8, 5.2)    |
| West          | 22.4 (20.5, 24.3)                                   | 3.6 (3.5, 3.8)    |

<sup>a</sup>From the U.S. National Health Survey (U.S. Department of Health and Health Education and Welfare, 1960).

<sup>b</sup>From the 2010 Behavioral Risk Factor Surveillance System of the 50 states and the District of Columbia; n = 420,307 participants aged  $\geq 25$  yr (Centers for Disease Control and Prevention, 2010a).

**Appendix Table 3.** Projections of Edentulism Prevalence in 2020 and 2050 among U.S. Adults Aged  $\geq 15$  Yr

| Age, yr          | 2020 Projections           |                            |                            | 2050 Projections           |                            |                            |
|------------------|----------------------------|----------------------------|----------------------------|----------------------------|----------------------------|----------------------------|
|                  | Population, n <sup>a</sup> | Edentulous, % <sup>b</sup> | Edentulous, n <sup>c</sup> | Population, n <sup>a</sup> | Edentulous, % <sup>b</sup> | Edentulous, n <sup>c</sup> |
| 15-19            | 20,806                     | 0.0 (0.0, 0.0)             | 0 (0, 0)                   | 23,642                     | 0.0 (0.0, 0.0)             | 0 (0, 0)                   |
| 20-24            | 21,651                     | 0.1 (0.0, 0.2)             | 17 (0, 41)                 | 24,463                     | 0.1 (0.0, 0.2)             | 19 (0, 46)                 |
| 25-29            | 23,366                     | 0.5 (0.4, 0.7)             | 125 (93, 153)              | 25,493                     | 0.5 (0.4, 0.7)             | 136 (102, 167)             |
| 30-34            | 22,906                     | 1.0 (0.8, 1.2)             | 226 (179, 272)             | 25,949                     | 1.0 (0.8, 1.2)             | 256 (203, 308)             |
| 35-39            | 21,869                     | 1.4 (1.1, 1.7)             | 315 (251, 380)             | 25,513                     | 1.4 (1.1, 1.7)             | 368 (292, 444)             |
| 40-44            | 20,361                     | 1.9 (1.5, 2.3)             | 386 (306, 468)             | 24,655                     | 1.9 (1.5, 2.3)             | 467 (370, 566)             |
| 45-49            | 20,008                     | 2.3 (1.8, 2.8)             | 470 (370, 570)             | 24,262                     | 2.3 (1.9, 2.8)             | 570 (449, 691)             |
| 50-54            | 20,467                     | 2.8 (2.2, 3.4)             | 575 (452, 697)             | 23,866                     | 2.8 (2.2, 3.4)             | 670 (527, 812)             |
| 55-59            | 21,747                     | 3.3 (2.6, 4.0)             | 709 (556, 861)             | 24,094                     | 3.3 (2.6, 4.0)             | 785 (616, 954)             |
| 60-64            | 21,017                     | 3.7 (2.9, 4.5)             | 781 (609, 949)             | 22,348                     | 3.7 (2.9, 4.5)             | 830 (648, 1,009)           |
| 65-69            | 18,052                     | 8.7 (7.3, 10.1)            | 1,579 (1,313, 1,829)       | 20,144                     | 4.2 (3.2, 5.1)             | 839 (654, 1,022)           |
| 70-74            | 14,744                     | 9.7 (8.0, 11.2)            | 1,425 (1,184, 1,655)       | 17,410                     | 4.6 (3.6, 5.6)             | 804 (626, 981)             |
| 75-79            | 10,010                     | 20.2 (18.1, 22.3)          | 2,021 (1,816, 2,234)       | 15,243                     | 5.1 (3.9, 6.2)             | 773 (601, 945)             |
| 80-84            | 6,470                      | 21.9 (19.6, 24.2)          | 1,414 (1,269, 1,564)       | 12,963                     | 5.5 (4.3, 6.8)             | 716 (555, 877)             |
| 85-89            | 3,934                      | 32.1 (29.5, 34.5)          | 1,264 (1,162, 1,357)       | 9,958                      | 6.0 (4.6, 7.3)             | 596 (461, 730)             |
| 90-94            | 2,008                      | 34.6 (31.8, 37.2)          | 694 (638, 746)             | 5,594                      | 6.4 (5.0, 7.9)             | 360 (278, 442)             |
| 95-99            | 645                        | 44.2 (40.0, 48.5)          | 285 (258, 313)             | 1,985                      | 14.3 (11.8, 16.7)          | 284 (234, 331)             |
| <sup>3</sup> 100 | 106                        | 47.2 (42.5, 51.9)          | 50 (45, 55)                | 442                        | 15.2 (12.4, 17.9)          | 67 (55, 79)                |
| All $\geq 15$ yr | 270,167                    | 4.6 (4.2, 4.9)             | 12,346 (11,374, 13,354)    | 328,024                    | 2.6 (2.1, 3.1)             | 8,561 (6,816, 10,295)      |

<sup>a</sup>Number of people in population, in thousands. From U.S. Census Bureau Population Division (2012).

<sup>b</sup>Prediction limits (95%) from Monte-Carlo sensitivity analysis in parentheses.

<sup>c</sup>Number of edentulous people, in thousands (95% prediction limits in parentheses).
